# Supplementary material for: A flexible VOCs sensor based on a 3D Mxene framework with a high sensing performance
Source: Royal Society of Chemistry journal article supplement (doi:10.1039/c8ta06928j), 2018-01-01
Supplement: c8ta06928j1.pdf [file c8ta06928j1.pdf]

## Supporting Information

### A flexible VOCs sensor based on 3D Mxene framework with high sensing performance

*Wenjing Yuan\**, *Kai Yang*, *Huifen Peng*, *Fang Li*, and *Fuxing Yin\**

School of Materials Science & Engineering, Tianjin Key Laboratory of Materials Laminating Fabrication and Interface Control Technology, Hebei University of Technology, Tianjin 300130, China.

E-mail: [ywj11@tsinghua.org.cn](mailto:ywj11@tsinghua.org.cn); [yinfuxing@hebut.edu.cn](mailto:yinfuxing@hebut.edu.cn)

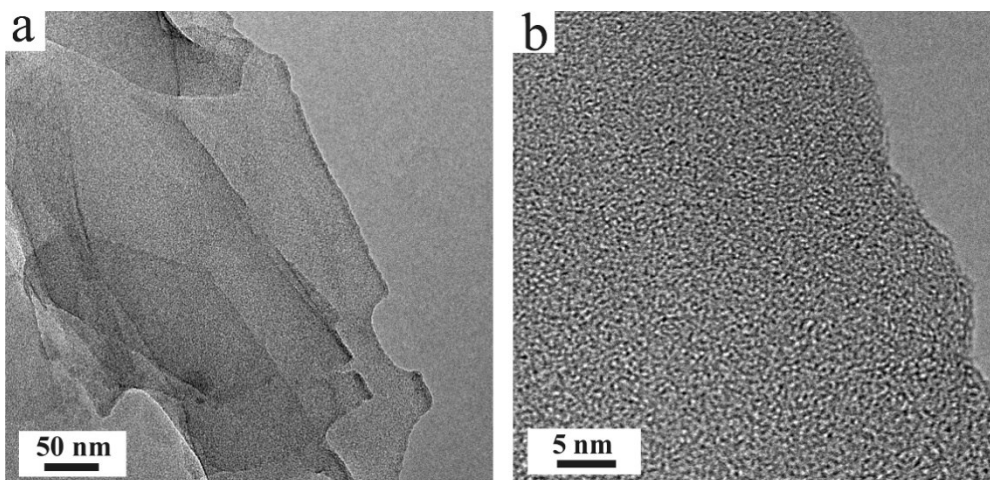

**Figure S1.** TEM images of Mxene sheets.

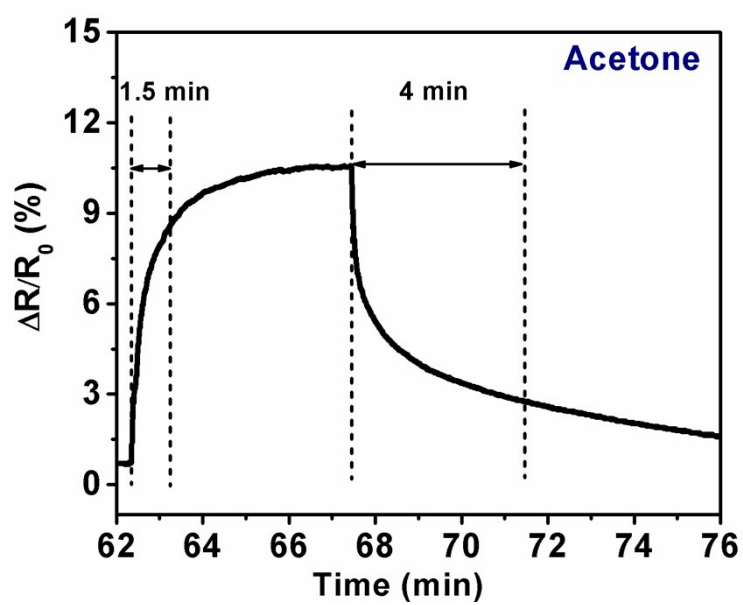

**Figure S2.** Analysis of the response and recovery time at saturated acetone vapor.

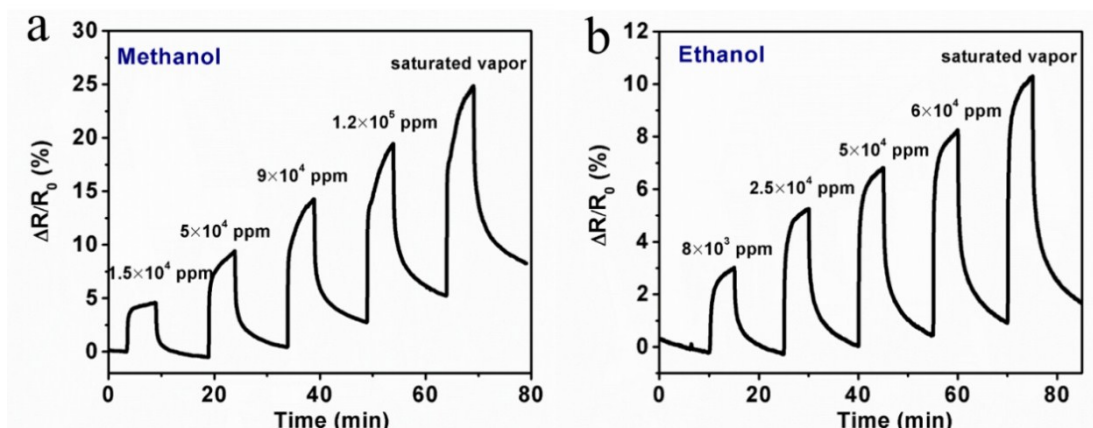

**Figure S3.** Plot of responses versus time for a 3D-M sensor upon exposure to (a) methanol and (b) ethanol with high concentrations up to saturated vapor steam.

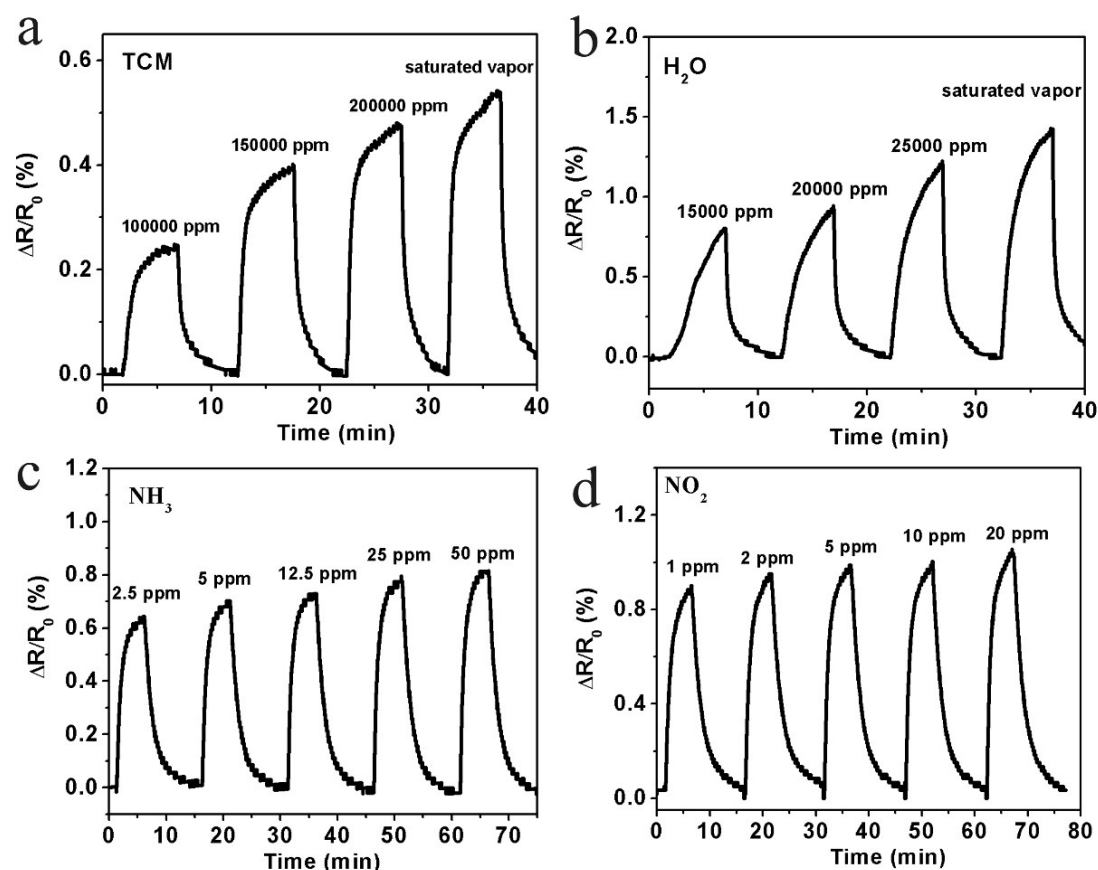

**Figure S4.** Sensing responses of 3D-M sensor upon exposure to (a) TCM and (b) H<sub>2</sub>O at higher concentrations up to saturated vapor; Sensing responses of 3D-M sensor upon exposure to (c) NH<sub>3</sub> and (d) NO<sub>2</sub> at high concentrations until the responses approximated saturation.

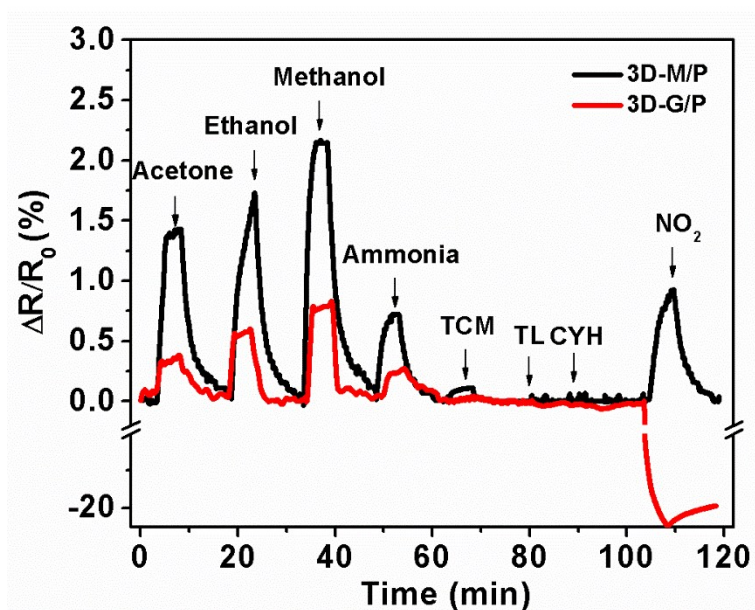

**Figure S5.** Comparison of the sensing responses of the 3D-M and 3D-G sensor upon exposure to different organic and inorganic gases (acetone, ethanol, methanol, ammonia and  $\text{NO}_2$ : 10 ppm; TCM, TL, CYH: 10000 ppm)

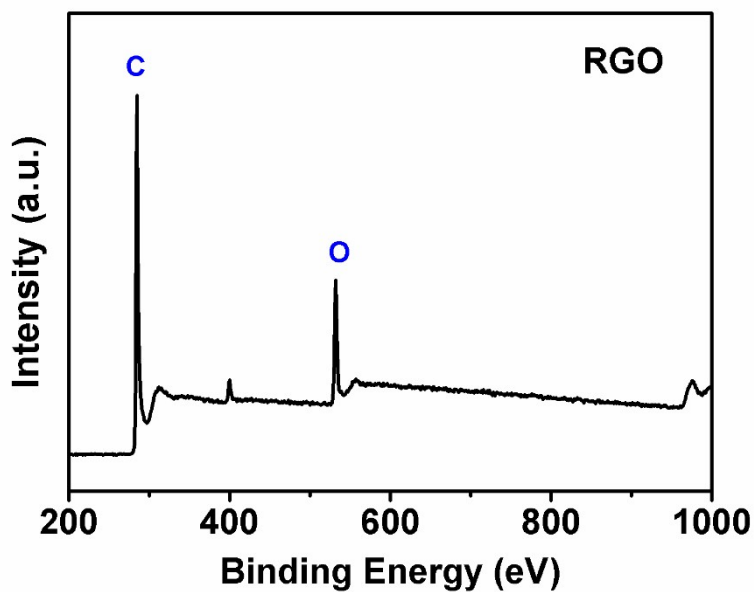

**Figure S6.** XPS spectrum of the RGO film.
